# Supplementary material for: Computer simulation study of the materials properties of intercalated and exfoliated poly(ethylene)glycol clay nanocomposites
Source: Royal Society of Chemistry journal article supplement (doi:10.1039/b822666k), 2009-01-01
Supplement: b822666k.pdf [file b822666k.pdf]

## Computer simulation study of the materials properties of intercalated and exfoliated poly(ethylene)glycol clay nanocomposites

James L. Suter and Peter V. Coveney

Centre for Computational Science, Department of Chemistry,  
University College London,  
20 Gordon Street, London, WC1H 0AJ, United Kingdom.

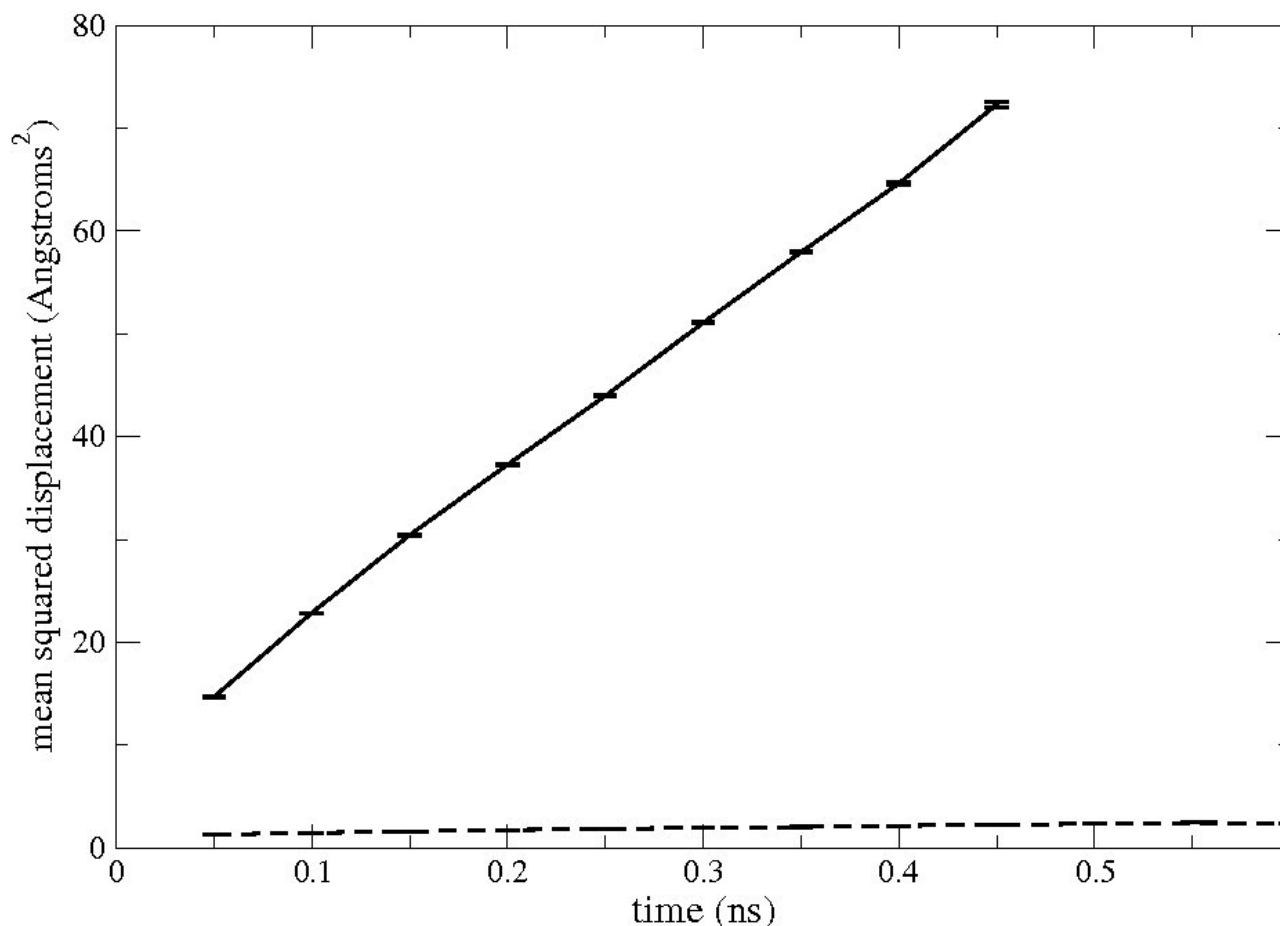

Figure S1: The mean squared displacement of PEO backbone atoms during pre-equilibration annealing molecular dynamics simulations at 500K of system I (solid line). Also shown is the mean-squared displacement at 300K (dashed line). We see much more motion at the higher temperature, allowing the system to explore configurational space.

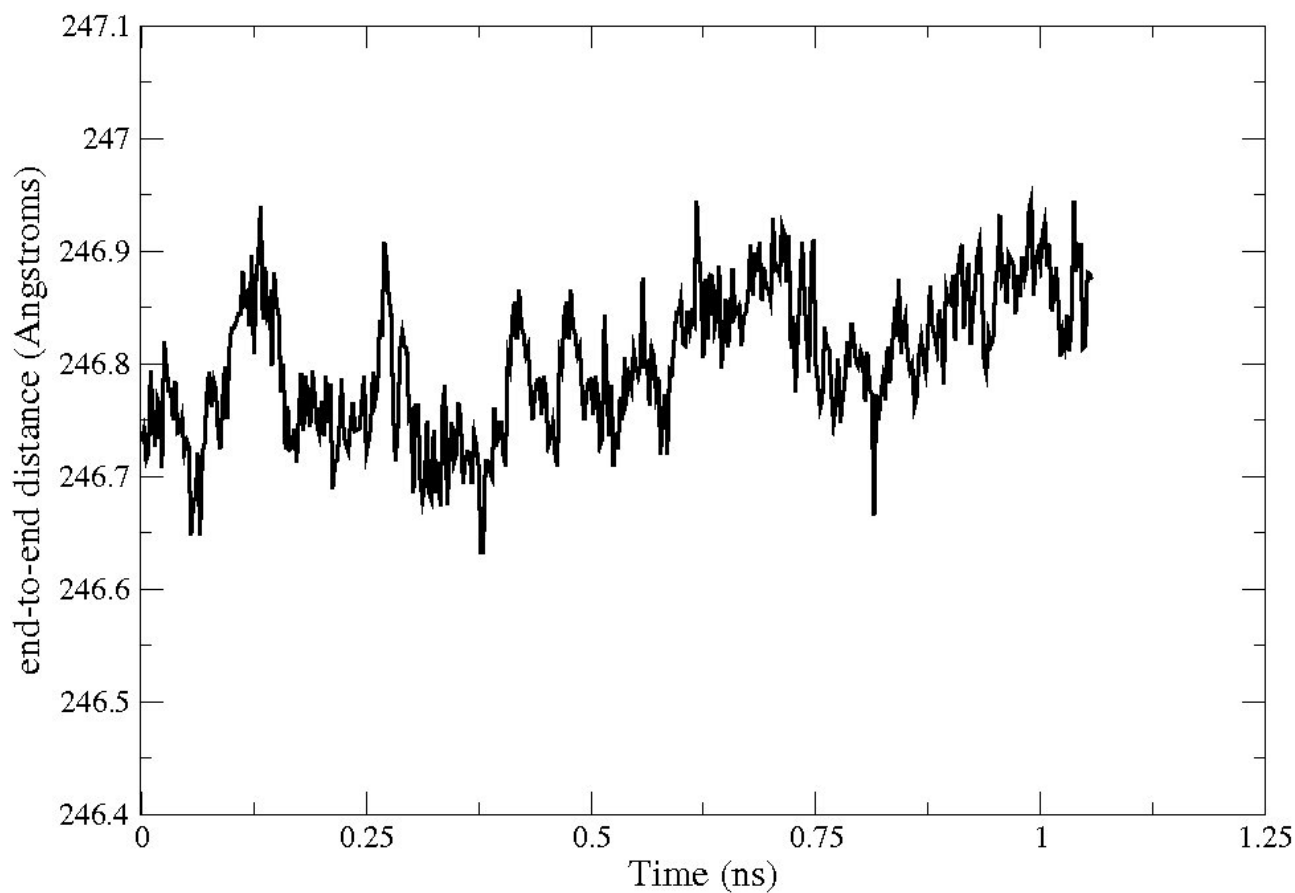

Figure S2: The end-to-end distance of PEO chains as a function of time over the last 1.0ns of simulation at 300K of the exfoliated clay system  $\{\mathbf{I}\}$ . We see there is very little drift in the value.

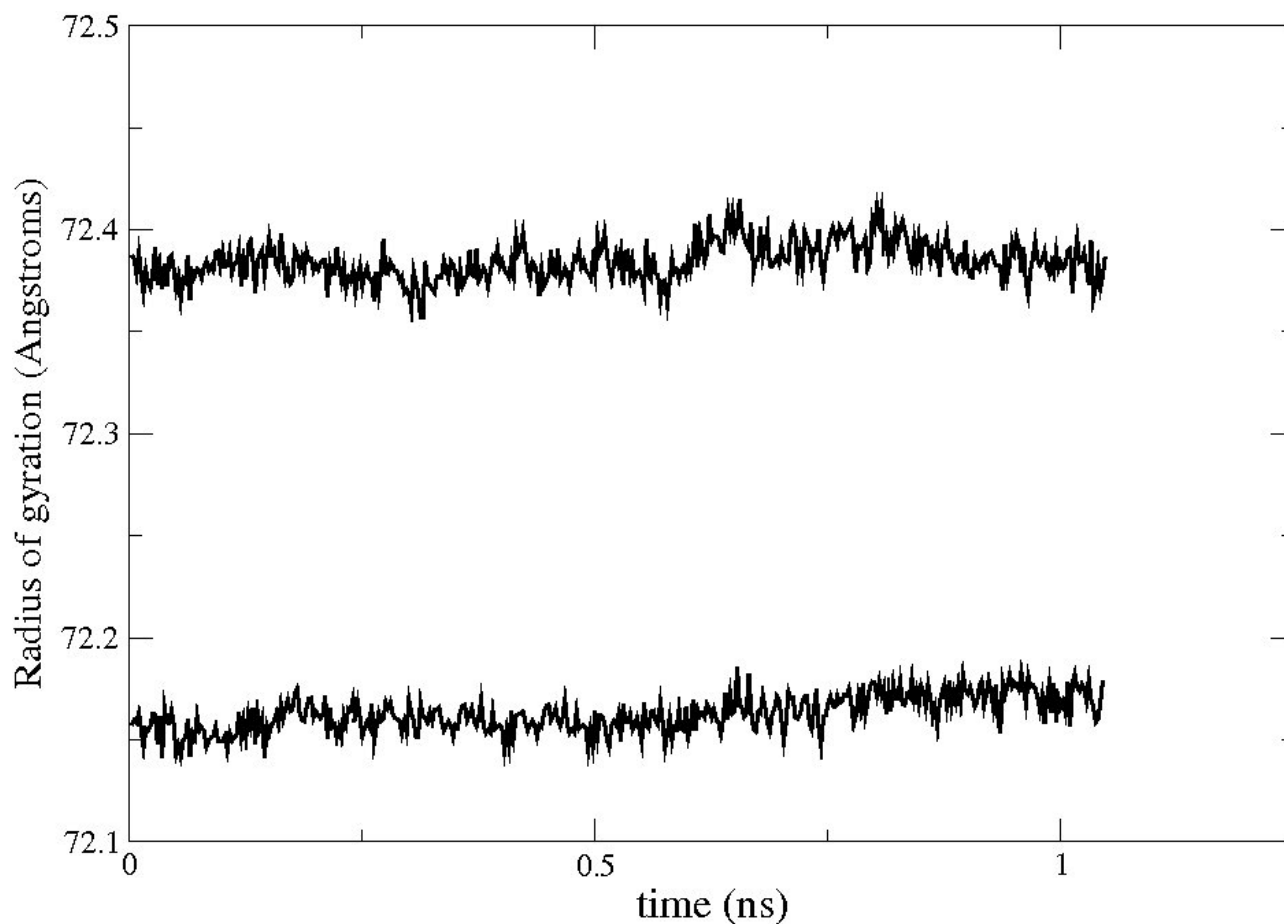

Figure S3: The radius of gyration of PEO chains in the layer closest to the clay surface (upper curve) and the layer furthest from the clay sheet (lower curve) as a function of time over the last 1.0ns of simulation at 300K of the exfoliated clay system I. We see there is negligible drift in these
